# Supplementary material for: A Charcot-Marie-Tooth-Causing Mutation in HSPB1 Decreases Cell Adaptation to Repeated Stress by Disrupting Autophagic Clearance of Misfolded Proteins
Source: Cells. 2022 Sep 15;11(18):2886. doi: 10.3390/cells11182886 (PMC9496658; doi:10.3390/cells11182886)
Supplement: Supplementary file 1 [file cells-11-02886-s001.zip › cells-1849914-supplementary.pdf]

# A Charcot-Marie-Tooth-causing Mutation in HSPB1 Decreases Cell Adaptation to Repeated Stress by Disrupting Autophagic Clearance of Misfolded Proteins

Xuelian Zhang<sup>1</sup>, Yaru Qiao<sup>1</sup>, Ronglin Han<sup>1</sup>, Yingjie Gao<sup>2</sup>, Xun Yang<sup>1</sup>, Ying Zhang<sup>1</sup>, Ying Wan<sup>1</sup>, Wei Yu<sup>3\*</sup>, Xianchao Pan<sup>2\*</sup> and Juan Xing<sup>1\*</sup>

<sup>1</sup> Department of Pathophysiology, School of Basic Medical Science, Southwest Medical University, Luzhou, 646000, China;

<sup>2</sup> Department of Medicine Chemistry, School of Pharmacy, Southwest Medical University, Luzhou, 646000, China;

<sup>3</sup> State Key Laboratory of Genetic Engineering, School of Life Sciences, Zhongshan Hospital, Fudan University, Shanghai, 200438, China.

\* Correspondence: xingjuan217@swmu.edu.cn (J.X.); panxc@swmu.edu.cn (X.P.); yuw@fudan.edu.cn (W.Y.)

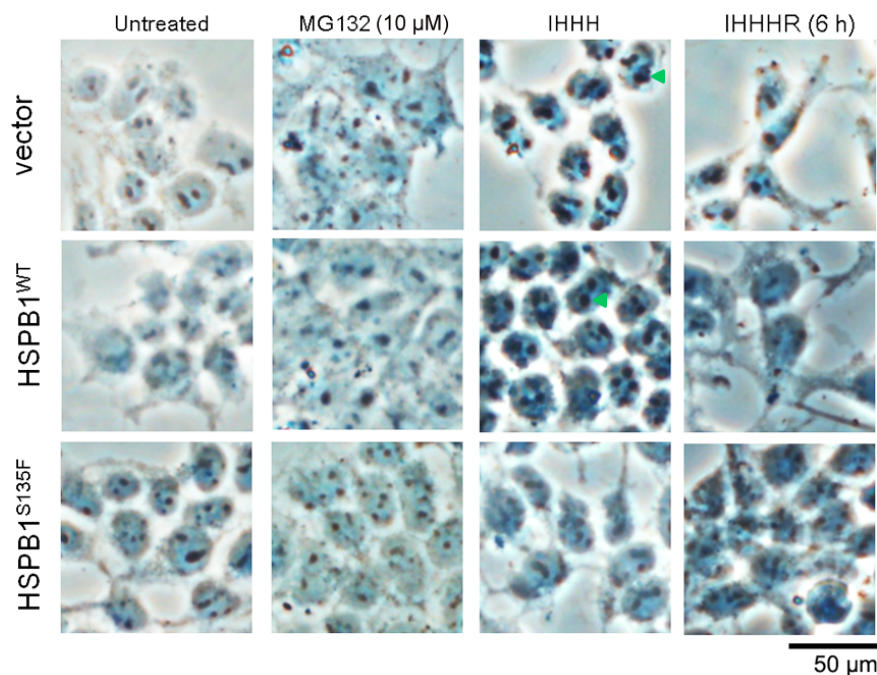

**Figure S1.** Stress-induced aggresomes in HEK293T cells were shown as dark inclusions by phase contrast microscope (indicated by green triangles). Dark inclusions in heated cells with vector or HSPB1<sup>WT</sup> disappeared after recovery of 6 h. There are some dark dots scattered in HSPB1<sup>S135F</sup> cells, but obviously stress-induced formation of aggresomes was absent. Scale bar: 50 μm.

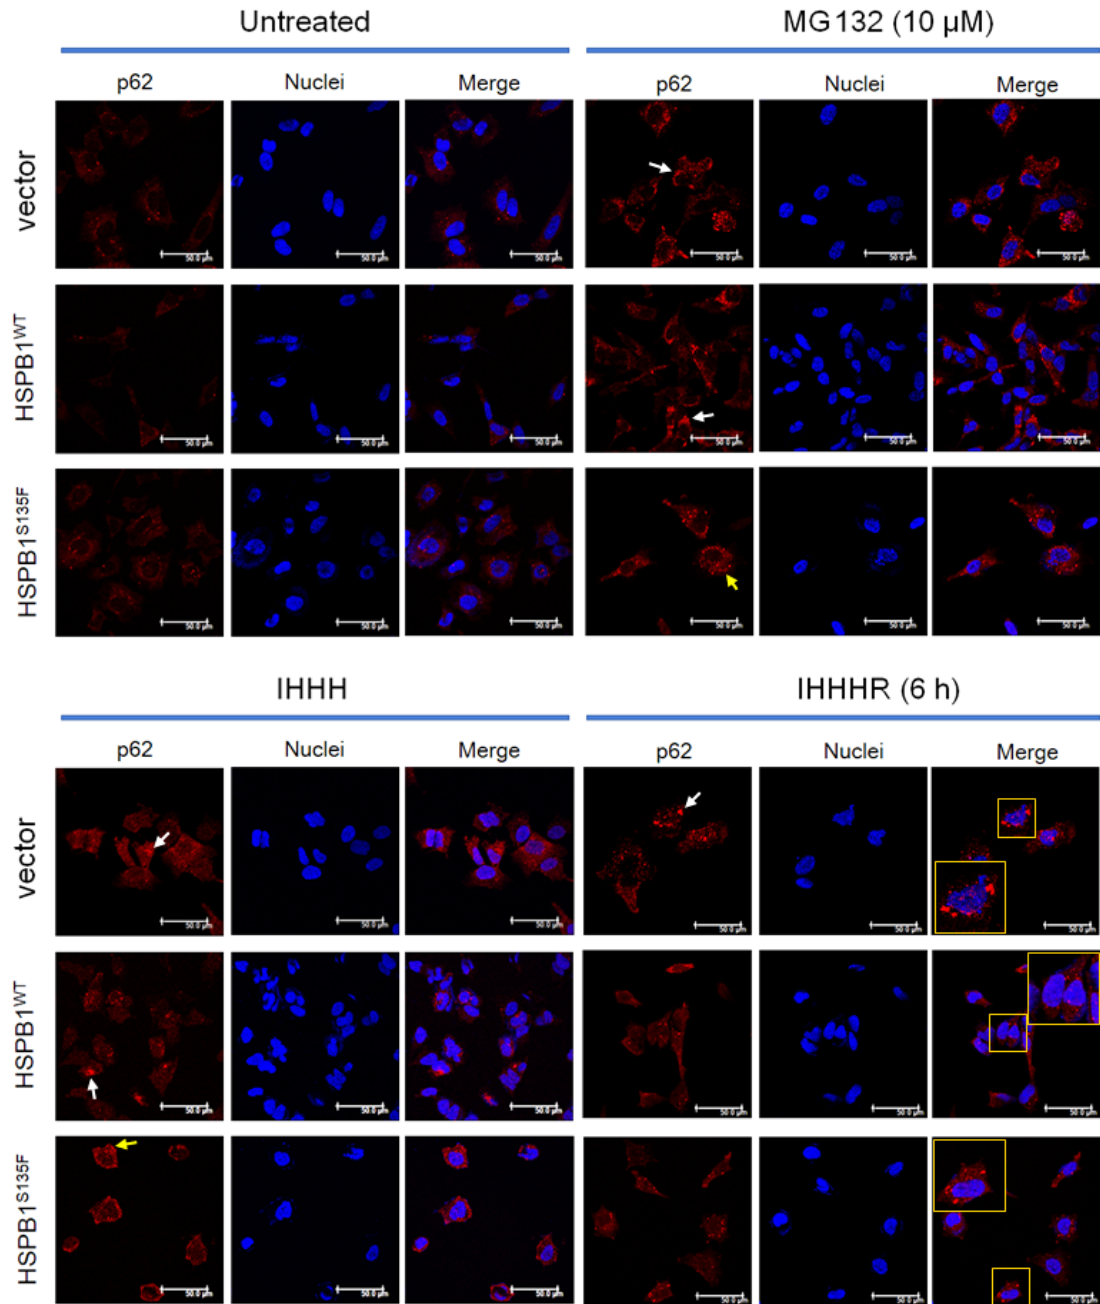

**Figure S2.** HSPB1<sup>S135F</sup> prevents perinuclear transport of p62 in SH-SY5Y cells under stress condition. Stress induced perinuclear accumulation of p62 punctuate inclusions in vector and HSPB1<sup>WT</sup> cells was indicated by white arrows. Yellow arrows show uniform distribution of p62 in HSPB1<sup>S135F</sup> cells. After recovery of 6 h, fewer punctuate inclusions was observed in HSPB1<sup>WT</sup> cells compared with vector and HSPB1<sup>S135F</sup> cells. Besides, p62 punctuate inclusions located around nuclear in cells with vector, while away from nuclear in cells with HSPB1<sup>S135F</sup>. Insets are magnified images. Scale bars: 50  $\mu$ m.
